1 **Attributable is Preventable: Corrected and revised estimates of population attributable**  
2 **fraction of TB related to undernutrition in 30 high TB burden countries**

3 Anurag Bhargava<sup>1,2,3\*</sup>, Madhavi Bhargava<sup>2,4</sup>, Andrea Beneditti<sup>2,3,5</sup>, Anura Kurpad<sup>6</sup>

4 <sup>1</sup> Department of General Medicine, Yenepoya Medical College, Mangaluru, Karnataka. 575018.  
5 India

6 <sup>2</sup> Center for Nutrition Studies, Yenepoya (Deemed to be University), Mangaluru, Karnataka.  
7 575018. India

8 <sup>3</sup> Department of Medicine, McGill University, Montreal. H3A 0G4. Canada.

9 <sup>4</sup> Department of Community Medicine, Yenepoya Medical College, Mangaluru, Karnataka.  
10 575018. India

11 <sup>5</sup> Department of Epidemiology, Biostatistics and Occupational Health, McGill University,  
12 Montreal.

13 <sup>6</sup> Department of Physiology, St John's Research Institute, Bangalore. 560066. India

14

15 **\*Corresponding Author:** Anurag Bhargava; Email: [anuragb17@gmail.com](mailto:anuragb17@gmail.com)

16

17

18

19 **Attributable is Preventable: Corrected and revised estimates of population**  
20 **attributable fraction of TB related to undernutrition in 30 high TB burden**  
21 **countries**

22 **Abstract**

23 **Introduction:** The Global TB Report 2020 estimated the population attributable fractions (PAF)  
24 for the major risk factors of TB. Undernourishment emerged as the leading risk factor accounting  
25 for 19% of the cases. The WHO however used the terms undernourishment and undernutrition  
26 interchangeably in its computation of PAF. Undernourishment is an indirect model derived  
27 estimate of decreased per capita energy availability, while undernutrition is defined by direct  
28 anthropometric measurements of nutritional status.

29 **Methods:** We re- estimated the PAF of undernutrition (instead of undernourishment) in 30 high  
30 TB burden countries, using the prevalence of undernutrition (age standardized estimate of BMI <  
31 18.5 kg/m<sup>2</sup> in adults for both sexes), and the relative risk (RR) of 3.2. Further, we revised PAF  
32 estimates of undernutrition with an RR of 4.49, in light of recent evidence.

33 **Findings:** Twenty four percent of TB in high burden countries is attributable to undernutrition.  
34 The PAF of undernutrition was highest in Asian countries, unlike the PAF of undernourishment  
35 that was highest in Africa. The corrected estimate led up to 65% increase in number of cases  
36 attributable to undernutrition in Asian countries. More than one-third to nearly half of TB cases  
37 in India could be attributable to undernutrition.

38 **Interpretation:** Estimation of the PAF of TB related to undernutrition is methodologically valid  
39 and operationally relevant, rather than PAF related to undernourishment. Addressing  
40 undernutrition, the leading driver of TB in high TB burden countries (especially Asia) could  
41 enable achievement of END TB milestones of TB incidence for 2025.

## 42 **Background**

43 Tuberculosis (TB) remains one of the major public health problems that cause morbidity and  
44 premature mortality in the low and middle income countries (LMIC). In the year 2019, an  
45 estimated 10 million people fell ill with TB, 1.2 million HIV negative patients with TB died, and  
46 0.21 million patient with HIV-TB co-infection died [1]. Ninety-five percent of the new cases as  
47 well as deaths occurred in the LMICs [1]. The new END TB strategy has ambitious goals for  
48 reduction of TB incidence and mortality and end the epidemic by 2035. The strategy has  
49 milestones for 2020 and 2025 that require TB incidence to decline by 20% and 50%, and TB  
50 mortality to decline by 35% and 75% by 2020 and 2025 respectively compared to the baseline  
51 2015 [2]. The current rate of decline of 9% of new cases and 14% of mortality since 2015 is not  
52 adequate to reach these milestones [1]. The END TB strategy envisages public health  
53 interventions to address the social determinants and risk factors of TB to complement the  
54 biomedical interventions, and achieve the 10% annual decline in TB incidence required to reach  
55 the 2025 milestone [2].

56 Infection with mycobacterium tuberculosis is necessary but not sufficient to result in TB disease.  
57 Latent infection of TB (LTBI) is prevalent in nearly one-quarter of the world population but only  
58 10% of this progress to active TB in their life time; innate and adaptive immunity prevents the  
59 progression in the rest [3,4]. Conditions like HIV infection, undernutrition (defined for example  
60 by a low body mass index, BMI), diabetes, alcohol use disorders and tobacco use, impair  
61 immune responses, increase the risk of active TB and act as drivers of the TB epidemic at the  
62 population level [5,6]. The strong, consistent and inverse association of BMI and TB incidence  
63 has been noted in large historical cohorts [7], as well as recent cohort studies which have

64 adjusted for confounders [8-10]. A systematic review of cohort studies concluded that this  
65 association of BMI and TB was causal [7].

66 The population attributable fraction (PAF) is an epidemiologic measure useful in the estimation  
67 of the public health impact of a particular risk factor for an outcome. It is the proportion by  
68 which the incidence an outcome in the entire population would be reduced if the risk factor was  
69 eliminated [11]. The key parameters that determine the PAF are the prevalence of a risk factor  
70 and the relative risk (RR) of disease associated with it [11].

71 An estimate of the PAFs of the aforementioned risk factors in 22 high TB burden countries was  
72 first reported more than a decade ago [12]. These were 11.0% for HIV, 26.9% for undernutrition,  
73 7.5% for diabetes, 9.8% for alcohol use disorders, and 15.8% for smoking [12]. While  
74 undernutrition accounted for the largest proportion of cases, the major risk factors driving the  
75 epidemic varied in individual countries. In South Africa, the PAF for HIV was 69.1% due to  
76 high HIV prevalence (18.1%), where as it was 35% for alcohol in Russia. The leading risk factor  
77 was undernutrition accounting for 31.6% of TB cases in India [12]. For estimation of the PAF of  
78 undernutrition, the prevalence of *undernourishment* (PoU) in the total population, according to  
79 Food and Agriculture Organization (FAO) estimates of 2008 were used, instead of prevalence of  
80 *undernutrition* [12]. The RRs of the risk factors in the above estimation were 26.7 for HIV, 3.2  
81 for undernutrition, 3.1 for diabetes, 2.9 for alcohol use disorders, and 2.0 for smoking [12]. The  
82 RR of 3.2 (95% CI 3.1–3.3) for undernutrition was based on a meta-analysis that compared the  
83 risk of TB for body-mass index (BMI) 16 kg/m<sup>2</sup> versus 25 kg/m<sup>2</sup>, based on an average reduction  
84 in TB incidence of 13.8% (95% CI 13.4–14.2) per unit increase in BMI [7]. This systematic  
85 review included six cohort studies, the most recent of which had not published final results at  
86 that time [7].

87 Recently the Global TB Report of 2020 updated the current PAFs for the five risk factors based  
88 on the global data; 19% for undernourishment, 7.7% for HIV, 3.1% for diabetes, 8.1% for  
89 alcohol use disorders, and 7.1% for smoking. The number of attributable cases related to these  
90 risk factors were estimated as 2.2 million for undernourishment, 0.76 million for HIV, 0.35  
91 million for diabetes, 0.72 million for alcohol use disorders, and 0.70 million for smoking.  
92 *Undernourishment* emerged as the leading risk factor, accounting for nearly three times the cases  
93 attributable to HIV, or that attributable to the combined diabetes, alcohol and tobacco [1].

94 **Rationale for correction of population attributable fraction of “undernourishment” as**  
95 **reported in the Global TB report 2020**

96 The PAF in 2010 was reported for the risk factor of *undernutrition*, while in 2020 it was reported  
97 for the risk factor of *undernourishment* [1, 12]. These two terms have been used interchangeably  
98 in both the reports. However, undernourishment as defined by FAO is different from  
99 undernutrition for public health and clinical purposes [13].

100 The FAO measure of undernourishment is derived by comparing the usual food consumption  
101 expressed in terms of dietary energy (kcal) with energy requirement norms. The part of the  
102 population with food consumption below this norm is considered undernourished and PoU  
103 estimates the percentage of population that have “habitual insufficient food consumption to  
104 provide, on an average, the amount of dietary energy required for maintaining a normal, active  
105 and healthy life”[14]. It is therefore a measure of chronic food insecurity, not based on actual  
106 energy intakes but per capita energy availability [13]. These estimates use three sources of data;  
107 the food balance sheets for the country, inequality in energy intakes, and the country energy  
108 requirements by sex and age group [14]. These are used to derive the four parameters in the  
109 analytic formula of PoU (Box-1) [14]. Thus PoU is not based on any direct individual

110 measurements but is an indirect national-level model-based indicator that measures the level of  
111 chronic hunger in a population. PoU estimates have a serious limitation as they do not allow  
112 disaggregated analysis to identify specific vulnerable populations to be identified in a country. It  
113 is also not possible to compute margins of error for the PoU.

114 **Box-1: Estimation of Prevalence of Undernourishment (PoU) by Food and Agriculture**  
115 **Organization (FAO)**

PoU estimates are obtained using the following analytic formula [14]:

$$PoU = \int_{-\infty}^{MDER} f(x|DEC; CV) dx$$

$$CV = \sqrt{(CV|y)^2 + (CV|r)^2}$$

Dietary Energy Consumption (DEC): It is an estimate of the per capita level of the average habitual, daily dietary energy consumption in the population.

MDER (Minimum Dietary Energy Requirement): It is the amount of energy needed for light activity and a minimum acceptable weight for attained height, and depending upon the gender and age structure of the population, it varies by country and from year to year.

Coefficient of Variation (CV): It is an estimate of the CV of the distribution of per capita levels of habitual dietary energy consumption and is the combination of two components. The  $CV|y$  is the component that is associated with differences in energy requirements in the population of a country.  $CV|r$  is the part of the variation that can be associated with differences in the socio-economic characteristics of the households

116 Undernutrition, on the other hand, is a physiological condition based on actual measurement of  
117 individual nutritional status [13]. It “describes the status of persons whose heights and weights  
118 lie below the lower limits of the ranges established for healthy people”[15]. In adults,

119    undernutrition is defined based on a low BMI ( $<18.5\text{kg/m}^2$ ) that reflects low body energy stores  
120    or chronic energy deficiency [16]. It has also been accepted as a criterion for clinical diagnosis of  
121    malnutrition/undernutrition in a consensus statement [5].

122    Thus undernourishment and undernutrition are two temporally distinct terms derived from  
123    different analytical approaches; undernourishment precedes the potential development of  
124    undernutrition, and these are not interchangeable. The FAO considered them complementary  
125    measures (Figure 1) [13]. Previous studies have highlighted that there may be differences in  
126    estimates of undernourishment and undernutrition determined by anthropometry as the former  
127    refers to poor availability of food while the latter reflects the outcome of undernourishment, and  
128    also affected by repeated infections, poor care and neglect [17].

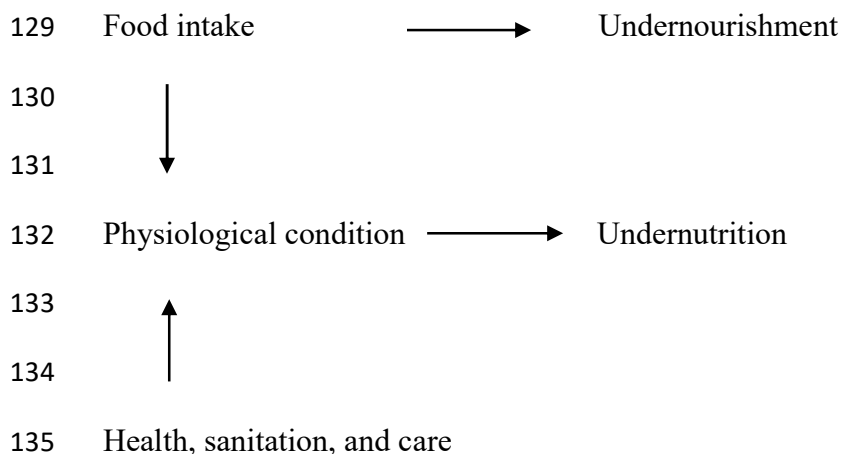

136    **Figure 1: Differentiating undernourishment and undernutrition**

137    Further, an estimate of PAF for any risk factor relies on the prevalence as well as the RR of the  
138    same exposure or risk factor, and this is not the case in the present methodology. In the case of  
139    the estimation of PAF of TB due to undernourishment the prevalence used is based on a  
140    measurement of chronic food insecurity while the RR is based on an anthropometric  
141    measurement. The 2010 estimates of PAF for undernutrition err in using the PoU for its

142 computation. On the other hand, the 2020 estimate of PAF for undernourishment errs in using  
143 the RR of undernutrition. It may be pointed out that RR for undernourishment is not available.

#### 144 **Recent evidence in favor of revising RR of TB related to undernutrition:**

145 Previous reviews of tuberculosis epidemiology have suggested a point estimate of the relative  
146 risk (RR) of undernutrition as 4.0 with a range of 2.0 to 6.0 [18]. The RR of 3.2 was derived  
147 from a particular systematic review of cohort studies in 2009 [7]. The results of studies in the  
148 past decade suggest a need for an upward revision of the relative risk of undernutrition for TB.  
149 The final results of a US-based cohort study included in the systematic review were published in  
150 2012 [10]. This cohort study involved a nationally representative sample of participants, while  
151 others in the meta-analysis were often restricted to males, or special populations like the elderly  
152 [7]. It also controlled for multiple confounders to arrive at the effects of nutritional status on TB  
153 incidence, and one of the few which had risk estimates for those with BMI <18.5 kg/m<sup>2</sup> [10]. The  
154 hazard ratio for the development of TB in those with BMI <18.5 kg/m<sup>2</sup> was 12.43 (95% CI: 5.75,  
155 26.95) while the RR for development of TB was 4.49 (95% CI: 2.28 - 8.86, p<0.0005) compared  
156 to those with normal BMI (18.5-25 kg/m<sup>2</sup>) [10]. A modeling study estimating the impact of  
157 reducing undernutrition on TB incidence in some high TB burden states in India [19],  
158 incorporated the final published results of this study into those of the previous meta-analysis [7].  
159 Using a penalized spline model to estimate the RR for different quartiles of BMI, it estimated  
160 RRs of 4.95 and 3.00 for those with BMI quartiles of ≤17.8 kg/m<sup>2</sup>, 17.80-≤19.64kg/m<sup>2</sup> compared  
161 to the reference of 22.25 kg/m<sup>2</sup> thus providing a continuum of risk [19]. Another limitation of the  
162 cohort studies in the systematic review was that they were all conducted in high income  
163 countries [7]. Recently in a cohort of household contacts of patients with active pulmonary  
164 tuberculosis in India, HIV and undernutrition were the only 2 independent risk factors associated



165 with the risk of incident TB [20]. The adjusted incidence rate ratio (aIRR) of undernutrition was  
166 6.16 (95% CI: 1.89, 20.03) measured as a composite index of low BMI (< 18.5 kg/m<sup>2</sup>) in adults,  
167 and less than two z-scores of weight or BMI for age in children [20]. Taken together these results  
168 suggest that the RR of 3.2 based on a comparison of BMI of 16 kg/m<sup>2</sup> vs. BMI of 25 kg/m<sup>2</sup> may  
169 be a conservative estimate, since the risk and rate ratio of those with BMI less than 18.5 were  
170 exceeding 4.0 in recent studies [10,19,20].

## 171 **Objectives**

172 The objective of the present study was to correct the estimates of PAF of undernutrition for TB  
173 using the prevalence and RR of undernutrition in 30 high burden countries. We further revised  
174 the estimate of PAF of undernutrition for TB using a revised RR based on recent evidence.

## 175 **Methods**

176 The current estimated PAFs and PoU were taken from the Global TB Report 2020 [1].  
177 Undernutrition was defined as a low BMI (<18.5 kg/m<sup>2</sup>) in adults [16]. For the prevalence of  
178 undernutrition, we used the age-standardized estimate of prevalence of underweight (BMI<18.5  
179 kg/m<sup>2</sup>) in both sexes in 30 high TB burden countries from the BMI database of the WHO Global  
180 Health Observatory [21]. PAFs were derived using the Levin formula [22]:

$$181 \text{ PAF} = \frac{\text{Prevalence (relative risk)}}{\text{Prevalence (relative risk-1)+ 1}}$$

182 First, we derived a corrected estimate of PAF of undernutrition for TB by substituting the PoU  
183 with prevalence of undernutrition. As a next step, we further revised the PAF using RR for  
184 undernutrition as 4.49. Confidence intervals (CI) for the PAFs were estimated using the method  
185 suggested by Natarajan et al [23]. We further derived the number of cases attributable to

186 undernutrition by multiplying the annual number of incident TB cases from the Global TB  
187 Report 2020 by the estimated PAFs (Figure 2).

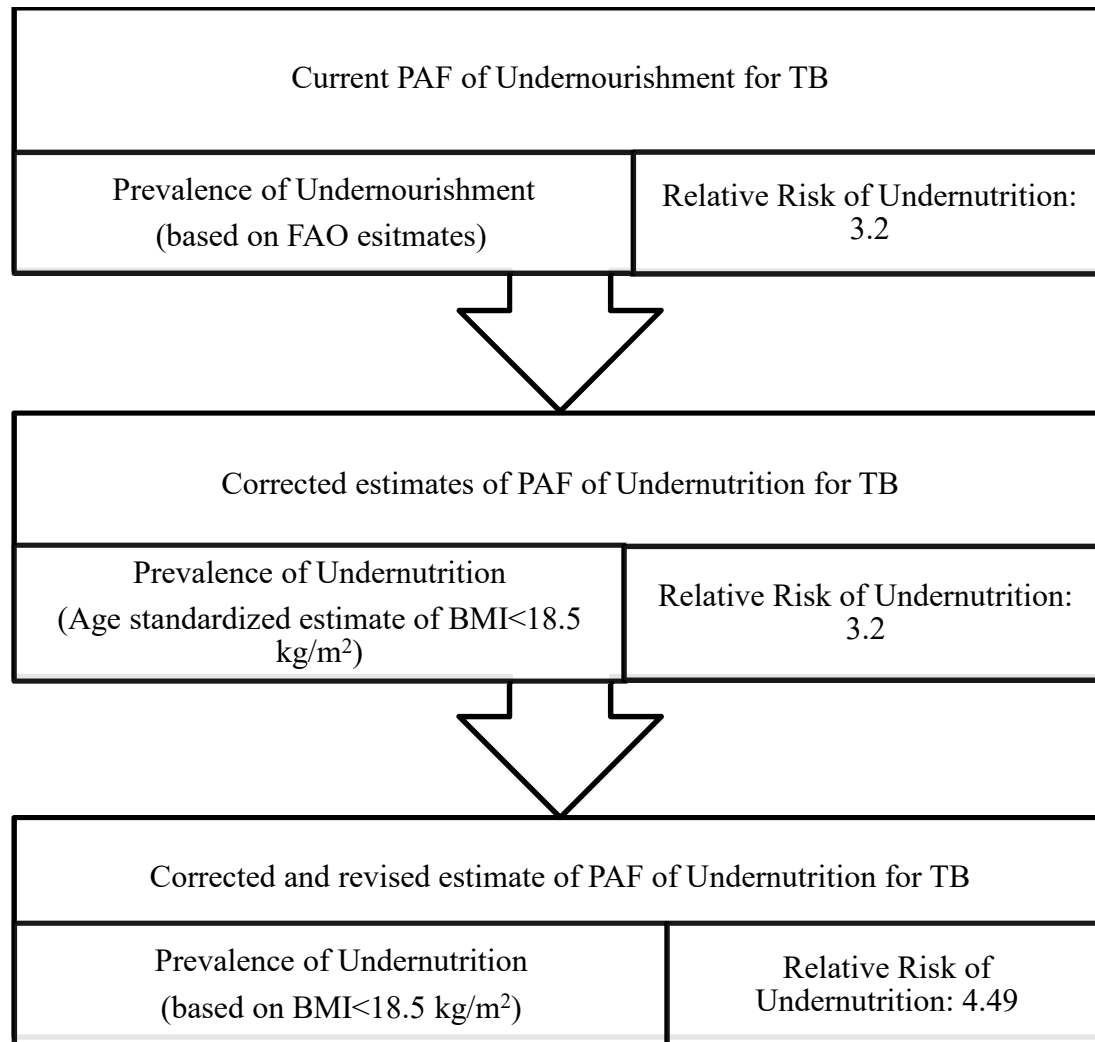

188

189 **Figure 2: Steps in arriving corrected and revised estimates of Population Attributable**  
190 **Fraction of undernutrition for TB**

## 191 **Results**

192 Table 1 shows the TB incidence and PoU in 30 high TB burden countries, the estimated PAF  
193 using a RR of 3.2 and the number of cases attributable to undernourishment. There were 8.62  
194 million incident cases in these 30 countries. The median (IQR) of the PoU was 18% (10.6, 29.5),

195 the median (IQR) of the PAF related to undernourishment was 28.3% (18.9, 39.3) and an  
 196 estimated 23.6% (1.96 million) of incident cases in 28 high burden countries were attributable to  
 197 undernourishment (excluding Democratic Republic of Congo and Papua New Guinea as they do  
 198 not have data on PoU). In Asian countries, the PoU ranged from 7.8% in Thailand to 20% in  
 199 Pakistan, while in African countries it ranged from 6.2% in South Africa to 60% in Central  
 200 African Republic. The PAFs of undernourishment in African countries ranged from 12% in  
 201 South Africa to 56% in Central African Republic, and in Asian countries from 14% in Thailand  
 202 to 30% in Pakistan. The three countries with the highest PAFs of undernourishment globally  
 203 were Central African Republic, Zimbabwe, and Democratic Republic of Korea; and overall the  
 204 PAFs were higher in the African countries than the Asian countries.

205 **Table 1: Population Attributable Fraction for Tuberculosis and attributable TB cases in**  
 206 **high burden countries using prevalence of undernourishment (FAO estimates) and RR=3.2**

| High TB burden Countries | Incident TB cases per year <sup>#</sup> | Prevalence of undernourishment (%)* | Population attributable fraction (%) | Attributable TB cases <sup>§</sup> |
|--------------------------|-----------------------------------------|-------------------------------------|--------------------------------------|------------------------------------|
| Angola                   | 112000                                  | 25                                  | 35.5                                 | 39742                              |
| Bangladesh               | 361000                                  | 15                                  | 24.8                                 | 89571                              |
| Brazil                   | 96000                                   | 2.5                                 | 5.2                                  | 5005                               |
| Cambodia                 | 47000                                   | 16                                  | 26.0                                 | 12237                              |
| CAR                      | 26000                                   | 60                                  | 56.9                                 | 14793                              |
| China                    | 833000                                  | 8.6                                 | 15.9                                 | 132529                             |
| Congo                    | 20000                                   | 40                                  | 46.8                                 | 9362                               |
| DPRK                     | 132000                                  | 48                                  | 51.4                                 | 67798                              |
| DRC                      | 278000                                  | Data not available                  |                                      |                                    |

|                    |         |                    |      |        |
|--------------------|---------|--------------------|------|--------|
| Ethiopia           | 157000  | 21                 | 31.6 | 49613  |
| India              | 2640000 | 15                 | 24.8 | 655038 |
| Indonesia          | 845000  | 8.3                | 15.4 | 130473 |
| Kenya              | 140000  | 29                 | 38.9 | 54530  |
| Lesotho            | 14000   | 13                 | 22.2 | 3114   |
| Liberia            | 15000   | 37                 | 44.9 | 6731   |
| Mozambique         | 110000  | 28                 | 38.1 | 41931  |
| Myanmar            | 174000  | 11                 | 19.5 | 33903  |
| Namibia            | 12000   | 27                 | 37.3 | 4472   |
| Nigeria            | 440000  | 13                 | 22.2 | 97854  |
| Pakistan           | 570000  | 20                 | 30.6 | 174167 |
| PNG                | 38000   | Data not available |      |        |
| Philippines        | 599000  | 13                 | 22.2 | 133215 |
| Russian Federation | 73000   | 2.5                | 5.2  | 3806   |
| Sierra Leone       | 23000   | 26                 | 36.4 | 8369   |
| South Africa       | 360000  | 6.2                | 12.0 | 43210  |
| Thailand           | 105000  | 7.8                | 14.6 | 15379  |
| URT                | 137000  | 31                 | 40.5 | 55549  |
| Viet Nam           | 170000  | 9.3                | 17.0 | 28874  |
| Zambia             | 59000   | 47                 | 50.8 | 29993  |
| Zimbabwe           | 29000   | 51                 | 52.9 | 15334  |

207 # Source: Global TB report 2020 \* Based on Food and Agriculture Organization (FAO) estimates of  
 208 prevalence of undernourishment cited in Global TB Report 2020.<sup>1</sup>

209 Abbreviations: CAR= Central African Republic; DPRK=Democratic People's Republic of Korea;  
210 DRC=Democratic Republic of the Congo; PAF= Population Attributable Fraction; RR= Relative Risk;  
211 PNG=Papua New Guinea; URT=United Republic of Tanzania

212 *Note: It is not possible to compute margins of error around PoU estimates.*

213  
214 Table 2 shows the prevalence of undernutrition and the corrected estimates of PAF and  
215 attributable cases. The median (IQR) of prevalence of undernutrition was 11.2% (8.0, 14.4), the  
216 median (IQR) of the PAF related to undernutrition was 19.7% (15.0, 24.0), and 24% (2.07  
217 million) of incident cases in all the 30 high burden countries were attributable to undernutrition.  
218 The prevalence of undernutrition was higher in the Asian countries than the PoU with a few  
219 exceptions and ranged from 12.3% in Philippines to 23.6% in India (the highest globally). The  
220 prevalence of undernutrition was higher than PoU by 10%, 57 %, and 90% in Thailand, India  
221 and Vietnam respectively. In the African countries, the prevalence of undernutrition was lower  
222 than PoU without exception and ranged from 4.7% in South Africa to the highest of 15.9% in  
223 Democratic Republic of Congo. In South Africa and Zimbabwe it was lower by 24% and 84%  
224 than the PoU estimates respectively. When the PAFs were recomputed replacing  
225 undernourishment with undernutrition, the median (IQR) PAF was 19.7 % ( 15.0, 24.0) with a  
226 range of 3% in Russia to 34.2% in India. The PAFs of undernutrition in African countries ranged  
227 from 9% in South Africa to 26% in Democratic Republic of Congo and in Asian countries from  
228 10% in China to 34% in India. The three countries with the highest PAF of undernutrition  
229 globally were India, Bangladesh and Vietnam. Among the African countries, the number of  
230 attributable cases declined by a median (IQR) of 50% (35, 57). In the Asian countries the overall  
231 change was a median (IQR) increase in attributable cases by 16.7% (-10, 35.7) [data not in  
232 table]. The overall increase in attributable cases in Myanmar, Bangladesh, India, Indonesia and

233 Vietnam was 25%, 29%, 38%, 43%, and 65% respectively. The number of cases attributable to  
 234 undernutrition in Asian countries was 1.7 millions and in African countries about 0.37 millions.

235 **Table 2: Population Attributable Fraction for Tuberculosis related to Undernutrition and**  
 236 **attributable TB cases in high burden countries using prevalence of undernutrition based**  
 237 **on anthropometry\* and Relative Risk of 3.2 (95% CI: 3.1, 3.3)**

| High TB burden Countries | Incident TB cases | Prevalence of undernutrition based on anthropometry [%,(95% CIs)] * | PAF for undernutrition# [%,(95% CIs)] | Attributable TB cases [(95% CIs)]·§ |
|--------------------------|-------------------|---------------------------------------------------------------------|---------------------------------------|-------------------------------------|
| Angola                   | 112000            | 13.5 (7.2, 21.10)                                                   | 22.9 (10.4, 33.2)                     | 25,647 (11,643, 37,169)             |
| Bangladesh               | 361000            | 21.5 (16.80, 26.70)                                                 | 32.1 (24.9, 38.6)                     | 115,922 (89,725, 139,401)           |
| Brazil                   | 96000             | 27.0 (18.0, 39.0)                                                   | 5.6 (3, 8.3)                          | 5,383 (2,915, 7,954)                |
| Cambodia                 | 47000             | 13.6 (8.90, 19.10)                                                  | 23 (14, 31)                           | 10,824 (6,561, 14,587)              |
| CAR                      | 26000             | 14.8 (8.9, 21.6)                                                    | 24.6 (13.6, 33.8)                     | 6,386 (3,537, 8,792)                |
| China                    | 833000            | 5.3 (3.9, 6.9)                                                      | 10.4 (7, 14)                          | 86,985 (58,014, 116,427)            |
| Congo                    | 20000             | 13.1 (8.9, 19.1)                                                    | 22.4 (13.2, 30.5)                     | 4,474 (2,636, 6,096)                |
| DPRK                     | 132000            | 6.6 (3.1, 12.2)                                                     | 12.7 (2.8, 21.5)                      | 16,736 (3,749, 28,335)              |
| DRC                      | 278000            | 15.9 (10.0, 22.5)                                                   | 25.9 (15.5, 34.8)                     | 72,044 (42,969, 96,746)             |
| Ethiopia                 | 157000            | 15.8 (10.5, 21.9)                                                   | 25.8 (16.2, 34.1)                     | 40,497 (25,494, 53,498)             |
| India                    | 2640000           | 23.6 (19.9, 27.6)                                                   | 34.2 (28.6, 39.3)                     | 384,898 (755,413, 1,038,631)        |
| Indonesia                | 845000            | 12.9 (9.3, 16.9)                                                    | 22.1 (15.2, 28.5)                     | 186,798 (128,076, 241,175)          |
| Kenya                    | 140000            | 11.8 (7.6, 16.9)                                                    | 20.6 (11.9, 28.4)                     | 28,854 (16,696, 39,745)             |
| Lesotho                  | 14000             | 7.9 (4.9, 11.6)                                                     | 14.8 (7.8, 21.4)                      | 2,073 (1,097, 2,991)                |
| Liberia                  | 15000             | 8.3 (4.9, 12.50)                                                    | 15.4 (7.6, 22.7)                      | 2,316 (1,145, 3,398)                |
| Mozambique               | 110000            | 11.1 (7.1, 15.9)                                                    | 19.6 (11.2, 27.2)                     | 21,590 (12,374, 29,918)             |

|                    |        |                   |                   |                           |
|--------------------|--------|-------------------|-------------------|---------------------------|
| Myanmar            | 174000 | 14.6 (10.4, 19.5) | 24.3 (16.4, 31.4) | 42,302 (28,545, 54,711)   |
| Namibia            | 12000  | 9.7 (6.1, 14.1)   | 17.6 (9.7, 24.8)  | 2,110 (1,161, 2,981)      |
| Nigeria            | 440000 | 10.3 (7.3, 13.9)  | 18.5 (12, 24.6)   | 81,285 (52,777, 108,162)  |
| Pakistan           | 570000 | 15.0 (10.8, 19.9) | 24.8 (17, 31.9)   | 141,429 (96,812, 181,693) |
| PNG                | 38000  | 2.3 (1.0, 4.4)    | 4.8 (0.7, 8.9)    | 1,830 (281, 3,400)        |
| Philippines        | 599000 | 12.3 (8.4, 16.7)  | 21.3 (13.6, 28.3) | 127,569 (81,626, 169,541) |
| Russian Federation | 73000  | 1.8 (1.1, 2.6)    | 3.8 (1.9, 5.8)    | 2,781 (1,409, 4,233)      |
| Sierra Leone       | 23000  | 10.3 (6.4, 14.9)  | 18.5 (10.2, 26)   | 4,249 (2,347, 5,977)      |
| South Africa       | 360000 | 4.7 (3.2, 6.4)    | 9.4 (5.7, 13.1)   | 33,736 (20,360, 47,290)   |
| Thailand           | 105000 | 8.6 (5.6, 12.3)   | 15.9 (9.1, 22.4)  | 16,705 (9,512, 23,472)    |
| URT                | 137000 | 11.0 (7.5, 15.1)  | 19.5 (12.2, 26.2) | 26,694 (16,717, 35,923)   |
| Viet Nam           | 170000 | 17.7 (13.6, 22.1) | 28 (21.1, 34.3)   | 47,645 (35,943, 58,342)   |
| Zambia             | 59000  | 11.2 (7.0, 16.0)  | 19.8 (11.2, 27.5) | 11,664 (6,623, 16,202)    |
| Zimbabwe           | 29000  | 7.9 (5.0, 11.4)   | 14.8 (8.1, 21.1)  | 4,294 (2,360, 6,124)      |

238 \*Source for age standardised BMI<18.5 kg/m<sup>2</sup> in both sexes reported in Global Health Observatory  
239 database on BMI (accessible at [https://www.who.int/data/gho/data/themes/topics/topic-](https://www.who.int/data/gho/data/themes/topics/topic-details/GHO/body-mass-index)  
240 [details/GHO/body-mass-index](https://www.who.int/data/gho/data/themes/topics/topic-details/GHO/body-mass-index)); #PAF calculated using a RR of 3.2(95% CI: 3.1-3.3);  
241 §Attributable cases using prevalence of undernutrition and RR of 3.2.;  
242 Abbreviations: CAR= Central African Republic; DPRK=Democratic People's Republic of Korea;  
243 DRC=Democratic Republic of the Congo; PAF= Population Attributable Fraction; RR= Relative Risk;  
244 PNG=Papua New Guinea; URT=United Republic of Tanzania

245

246 Table 3 shows the PAFs corrected using prevalence of undernutrition and revised RR of 4.49  
 247 (95% CI: 2.28, 8.86). The median (IQR) PAF attributable to undernutrition in 30 high TB burden  
 248 countries was 28% (21.8, 33.4), and 32.9% (2.84 million) of incident cases were attributable to  
 249 undernutrition. The revised PAF of undernutrition ranged from 5.9% in Russia to a maximum of  
 250 44.5% in India. The estimated number of cases attributable to undernutrition computed with a  
 251 higher RR of undernutrition was 2.3 millions in Asia and 0.45 millions in Africa.

252 **Table 3: Population Attributable Fraction for Tuberculosis related to undernutrition and**  
 253 **attributable cases in high burden countries using prevalence of undernutrition based on**  
 254 **anthropometry and Relative Risk of 4.49 (2.28, 8.86)**

| High TB burden Countries | Incident TB cases | Prevalence of undernutrition based on anthropometry *[% , (95% CIs)] | PAF with revised RR <sup>§</sup> [% , (95% CIs)] | Attributable TB cases due to undernutrition estimated with revised RR <sup>‡</sup> [(95% CIs)] |
|--------------------------|-------------------|----------------------------------------------------------------------|--------------------------------------------------|------------------------------------------------------------------------------------------------|
| Angola                   | 112000            | 13.5 (7.2, 21.10)                                                    | 32.0 (5.6,65.2)                                  | 35869 (6271,73067)                                                                             |
| Bangladesh               | 361000            | 21.5 (16.80,26.70)                                                   | 42.9 (14.5,70.4)                                 | 154756 (52210,254096)                                                                          |
| Brazil                   | 96000             | 2.7 (1.80,3.90)                                                      | 8.6 (1.6,2.5)                                    | 8267 (1513,24430)                                                                              |
| Cambodia                 | 47000             | 13.6 (8.90,19.10)                                                    | 32.2 (7.7,63.0)                                  | 15128 (3600,29595)                                                                             |
| CAR                      | 26000             | 14.8 (8.9,21.6)                                                      | 34.1 (7.5,65.9)                                  | 8855 (1937,17128)                                                                              |
| China                    | 833000            | 5.3 (3.9,6.9)                                                        | 15.6 (3.7,38.0)                                  | 130029 (30702,316860)                                                                          |
| Congo                    | 20000             | 13.1 (8.9,19.1)                                                      | 31.4 (7.2,62.4)                                  | 6275 (1440,12472)                                                                              |
| DPRK                     | 132000            | 6.6 (3.1,12.2)                                                       | 18.7 (1.5,50.8)                                  | 24713 (1943,67064)                                                                             |
| DRC                      | 278000            | 15.9 (10.0,22.5)                                                     | 35.7 (8.6,66.6)                                  | 99212 (23761,185848)                                                                           |
| Ethiopia                 | 157000            | 15.8 (10.5,21.9)                                                     | 35.5 (9.0,66.1)                                  | 55802 (14156,103834)                                                                           |
| India                    | 2640000           | 23.6 (19.9,27.6)                                                     | 45.2 (17.0,71.0)                                 | 1192346 (448963,1874920)                                                                       |
| Indonesia                | 845000            | 12.9 (9.3,16.9)                                                      | 31.0 (8.4,60.2)                                  | 262326 (70712,508230)                                                                          |



|                    |        |                  |                  |                       |
|--------------------|--------|------------------|------------------|-----------------------|
| Kenya              | 140000 | 11.8 (7.6,16.9)  | 29.2 (6.5,60.0)  | 40837 (9063,83952)    |
| Lesotho            | 14000  | 7.9 (4.9,11.6)   | 21.6 (4.2,50.7)  | 3026 (583,7092)       |
| Liberia            | 15000  | 8.3 (4.9,12.50)  | 22.5 (4.1,52.5)  | 3369 (608,7879)       |
| Mozambique         | 110000 | 11.1 (7.1,15.9)  | 27.9 (6.1,58.5)  | 30714 (6694,64387)    |
| Myanmar            | 174000 | 14.6 (10.4,19.5) | 33.8 (9.1,63.4)  | 58733 (15864,110332)  |
| Namibia            | 12000  | 9.7 (6.1,14.1)   | 25.3 (5.2,55.5)  | 3035 (623,6664)       |
| Nigeria            | 440000 | 10.3 (7.3,13.9)  | 26.4 (6.5,55.2)  | 116344 (28660,242829) |
| Pakistan           | 570000 | 15.0 (10.8,19.9) | 34.4 (9.5,63.9)  | 195862 (53971,364071) |
| PNG                | 38000  | 20.3 (1.0,4.4)   | 7.4 (0.04,27.1)  | 2824 (144,10290)      |
| Philippines        | 599000 | 12.3 (84,16.7)   | 30.0 (7.5,59.8)  | 179905 (44705,358595) |
| Russian Federation | 73000  | 1.8 (1.1, 2.6)   | 5.9 (1.0,18.9)   | 4315 (727,13774)      |
| Sierra Leone       | 23000  | 10.3 (6.4, 14.9) | 26.4 (5.5,57.0)  | 6082 (1263,13114)     |
| South Africa       | 360000 | 4.7 (3.2,6.4)    | 14.1 (3.0,36.4)  | 50730 (10704,130904)  |
| Thailand           | 105000 | 8.6 (5.6,12.3)   | 23.1 (4.9,52.1)  | 24239 (5088,54707)    |
| URT                | 137000 | 11.0 (7.5,15.1)  | 27.7 (6.6,57.3)  | 38004 (9088,78524)    |
| Viet Nam           | 170000 | 17.7 (13.6,22.1) | 38.2 (12.1,66.4) | 64914 (20942,112843)  |
| Zambia             | 59000  | 11.2 (7.0,16.0)  | 28.1 (6.1, 58.9) | 16581 (3582,34724)    |
| Zimbabwe           | 29000  | 7.9 (5.0, 11.4)  | 21.6 (4.3,50.3)  | 6268(1256, 14583)     |

255 \*Source for age standardised BMI<18.5 kg/m<sup>2</sup> in both sexes reported in Global Health Observatory

256 database on BMI (accessible at <https://www.who.int/data/gho/data/themes/topics/topic->

257 [details/GHO/body-mass-index](https://www.who.int/data/gho/data/themes/topics/topic-details/GHO/body-mass-index));

258 <sup>‡</sup> Revised RR as per the latest evidence (supplementary material for the rationale)<sup>10</sup>

259 Abbreviations: CAR= Central African Republic; DPRK=Democratic People's Republic of Korea;

260 DRC=Democratic Republic of the Congo; PAF= Population Attributable Fraction; RR= Relative Risk;

261 PNG=Papua New Guinea; URT=United Republic of Tanzania

262 Tables 2 and 3 also show the impact of this corrected and revised estimate on the number of  
263 cases attributable to undernutrition in India, the country with the highest burden of TB as well as  
264 prevalence of undernutrition. According to current estimates a quarter of the cases in India may  
265 be related to undernutrition (0.67 millions). Using a correction of PAF based on prevalence of  
266 undernutrition, this figure rises to one-third of incident cases (0.9 million), while the estimated  
267 PAF using a revised RR is nearly half of incident cases (1.2 millions). Figure 3 describes the TB  
268 incidence in all 30 high burden countries, the current, corrected and the revised figures (in  
269 thousands).

270

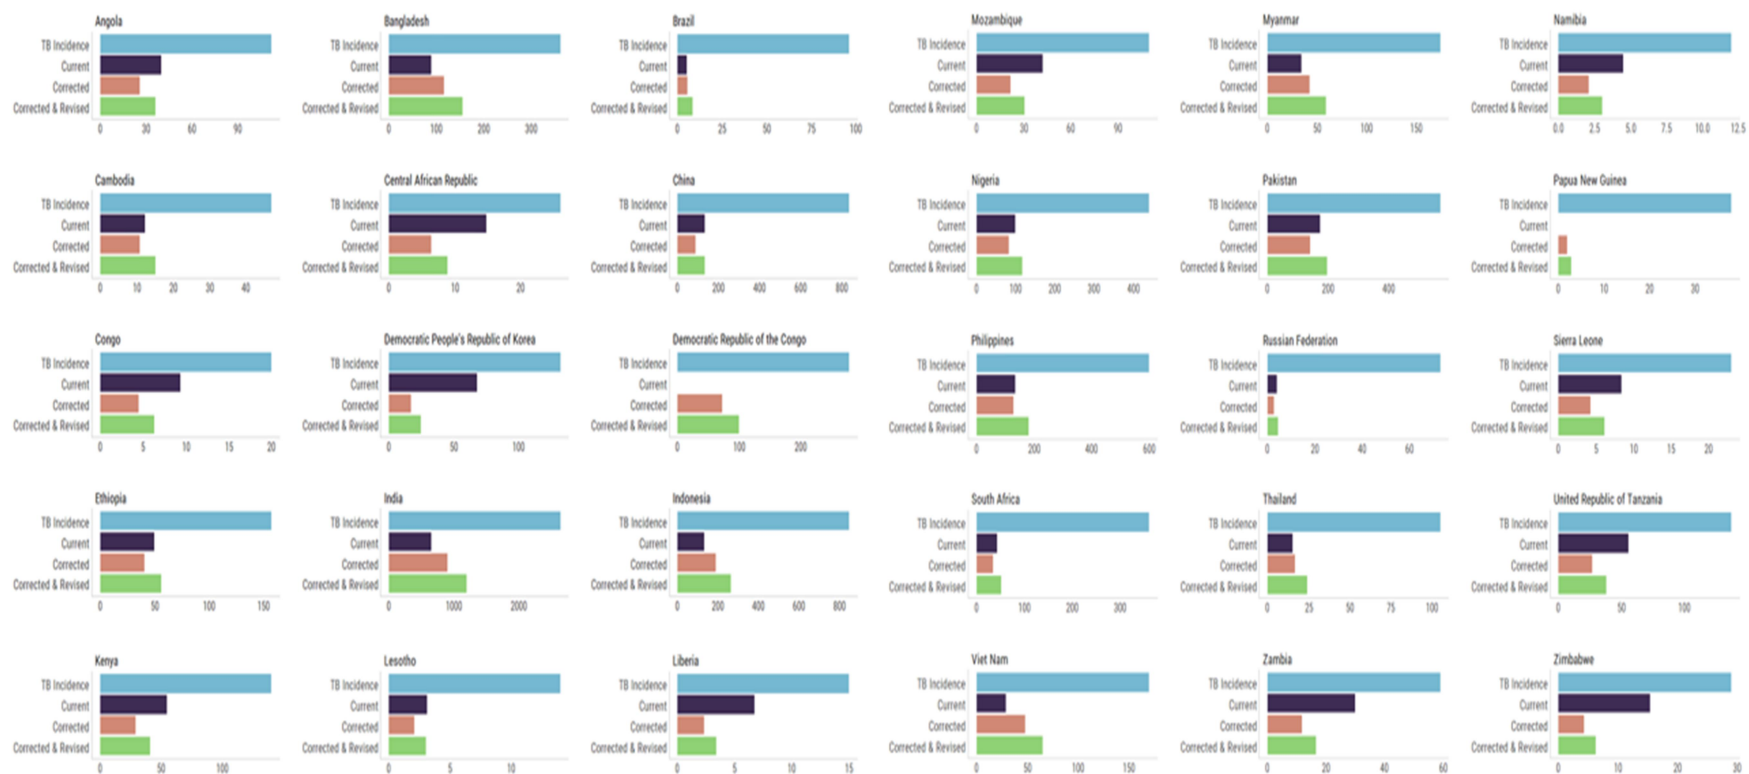

271

272 **TB incidence:** Reported incidence in the Global TB Report 2020; **Current:** Number of cases of TB based on Prevalence of  
 273 Undernourishment by Food and Agriculture Organization and relative risk (RR) of 3.2 as per the Global TB Report 2020; **Corrected:**  
 274 Number of cases of TB based on prevalence of undernutrition (Global Health Observatory) and RR of 3.2; **Revised:** Number of cases of  
 275 TB based on prevalence of undernutrition (Global Health Observatory figures) and revised RR of 4.49; In the absence of data on the  
 276 Prevalence of Undernourishment, current PAFs for undernourishment were not estimated for the Democratic Republic of the Congo  
 277 and Papua New Guinea.

278 **Figure 3: Number of cases of tuberculosis (in thousands) based on current, corrected and revised population attributable**

279 **fraction (PAF) related to undernourishment and undernutrition in 30 high TB burden countries.**

## 280 **Discussion**

281 We noted and addressed a methodological issue affecting the validity of the 2010 and 2020  
282 estimates attributable to undernutrition and undernourishment, respectively. These estimates  
283 appear to have interpreted undernutrition and undernourishment as interchangeable terms. The  
284 PAF of undernutrition in the 2010 estimate thus used the prevalence of undernourishment (rather  
285 than prevalence of low body mass index or undernutrition). The recent estimate of PAF of  
286 undernourishment was estimated using the relative risk of undernutrition, since there is no  
287 relative risk for TB available for the exposure of undernourishment.

288 We present for the first time, methodologically corrected estimates of the PAF of TB related to  
289 undernutrition, using both the prevalence and relative risk of the same risk factor of  
290 undernutrition. We also reported the number of cases attributable to undernutrition in high TB  
291 burden countries. Overall, the median PAF of undernutrition was 19.7% compared to the median  
292 PAF of 28.3% of undernourishment. In 30 high TB burden countries, 24% or 2.07 million out of  
293 8.62 million cases were attributable to undernutrition. In most Asian countries like India, PoU is  
294 less than prevalence of undernutrition and it underestimates the numbers who are underweight.  
295 On the other hand, the FAO estimates of undernourishment overestimate the proportion of  
296 people who are underweight in Africa. Overall undernutrition assumes an even greater  
297 imperative in the light of the COVID-19 pandemic, as food prices soar, as estimates suggest a  
298 doubling of the number of people experiencing acute hunger with serious implications for the TB  
299 epidemic [1,24].

300 After correction of the estimates, although the overall proportion of cases attributable to  
301 undernutrition increased only marginally, undernutrition emerged as the leading risk factor for  
302 TB in Asia. For example, the PAF based on PoU for India was 24.8% while that based on

303 prevalence of undernutrition was 34%, a substantial difference for a country with the highest TB  
304 burden in the world. Using the correct estimates of prevalence of undernutrition did not alter the  
305 global burden of cases attributable to undernutrition significantly (1.96 million to 2.07 million).  
306 However it helped identify specific high TB burden countries like India and other Asian  
307 countries with low prevalence of HIV, where undernutrition is the major risk factor for TB.  
308 These are the countries where TB prevention efforts may benefit significantly from public health  
309 measures to reduce the levels of adult undernutrition. Shifting the population distribution of BMI  
310 in adults towards a desirable BMI level could have a marked impact on TB incidence, as  
311 indicated by a meta-analysis and modeling studies [7, 19].

312 On replacing the RR of 3.2 with 4.49 for the revised estimates, the PAF of undernutrition  
313 increased to a median PAF of 28%. As a result, the number of cases attributable to undernutrition  
314 increases to 2.84 million of the total 8.62 million (32.9%) incident TB cases. This suggests that  
315 one-third of TB cases in 30 high TB burden countries could be attributable to undernutrition, and  
316 therefore could be potentially eliminated if undernutrition was addressed. This represents an  
317 absolute increase of 0.88 million cases or a relative increase of nearly 45% of incident cases  
318 attributable to undernutrition, compared to current estimates.

### 319 **Strengths and limitations**

320 Our study provides a valid estimate of the impact of undernutrition on the TB epidemic in 30  
321 high TB burden countries. The use of the metric of undernutrition rather than undernourishment  
322 has implications for various National TB control programs. The prevalence of undernourishment  
323 determined by FAO does not allow disaggregated analysis to identify specific vulnerable  
324 populations in a country [25]. The periodic demographic and health surveys which generate  
325 prevalence of undernutrition in children and adults however can highlight especially vulnerable

326 populations. Our higher revised estimate of RR for undernutrition is based on results from a  
327 cohort which had adjusted for the effects of confounders [10], and from a recent cohort from a  
328 high burden country with low HIV prevalence [20].

329 Our study has certain limitations. PAF is a static measure and some of the impact of addressing  
330 undernutrition is still not captured in these estimates [26]. In the case of transmissible diseases  
331 like TB, the prevention of progression to active disease by improved nutrition will also decrease  
332 the onward transmission of infection and prevent secondary cases. Measures like the  
333 transmission PAF may capture this impact [27]. We have not accounted for the interactions  
334 between undernutrition and other risk factors like HIV, diabetes, where a low BMI is also a risk  
335 factor for active TB [28], and the risk of TB is significantly higher for patients with diabetes who  
336 have a low BMI [29]. In fact comparatively the lowest risk was observed in obese patients with  
337 diabetes [29]. The association between undernutrition and incident TB in these estimates is an  
338 ecologic association and it cannot be confirmed whether the incident cases are actually occurring  
339 in those who have undernutrition. The estimates of low BMI in countries do not entirely capture  
340 the burden of undernutrition in the community. In India, for example, according to the National  
341 Family Health Survey-4, the prevalence of low BMI in adults is 23.6%, but a much higher  
342 proportion of children suffer from undernutrition; 38% of children under five had stunting (low  
343 height-for-age) and 36% were underweight (low weight-for-age) [30]. The wide confidence  
344 intervals around the RR attributable to undernutrition are due to paucity of cohort studies in  
345 populations with undernutrition. There is a need for larger cohort studies to estimate the RR of  
346 undernutrition which may be significantly higher than the 3.2 being currently used.

347

## 348 **Conclusion**

349 The estimation of PAF related to undernutrition rather than undernourishment is  
350 methodologically valid and operationally relevant and should be the basis of future such  
351 estimations. We report that with corrected and revised estimates of PAF of undernutrition, 2.07-  
352 2.84 million (24%-33%) of the 8.62 million TB cases in high burden countries may be  
353 attributable to undernutrition. The PAF of undernutrition at sub-national levels can provide  
354 actionable data for TB control efforts by identifying specific vulnerable populations with higher  
355 prevalence and PAFs of undernutrition. Undernutrition is the leading driver of TB globally and  
356 in the highest TB burden countries of Asia, and should be the focus of multi-sectoral efforts to  
357 reduce TB incidence in line with the goals of the END TB strategy.

## 358 **Contributors**

359 AB, MB AnB and AK conceptualized the study, AB and AnB did the data curation, formal  
360 analysis and visualization. AB and MB wrote the original draft; all authors were involved in  
361 reviewing and editing the versions thereafter.

## 362 **Data sharing**

363 All empirical data used in this study are made either publicly available, in the supplementary  
364 material or available from public domain.

## 365 **Acknowledgements**

366 Authors acknowledge the data visualization and graphs done by Mr Aman Bhargava, a student of  
367 Bachelors in Design at Srishti Manipal Institute of Art, Design and Technology, Bangalore

## 368 **References**

- 369 1. Global Tuberculosis Report 2020. Geneva: World Health Organization; 2020.
- 370 2. World Health Organization. Implementing the End TB strategy: The  
371 essentials.WHO/HTM/TB/2015.31. Geneva: WHO; 2015.
- 372 3. Houben RM, Dodd PJ. The Global Burden of Latent Tuberculosis Infection: A Re-  
373 estimation Using Mathematical Modelling. *PLoS Med.* 2016;13(10):e1002152.
- 374 4. Getahun H, Matteelli A, Chaisson RE, Raviglione M. Latent Mycobacterium tuberculosis  
375 Infection. *New England Journal of Medicine.* 2015;372(22):2127-35.
- 376 5. Cederholm T, Bosaeus I, Barazzoni R, Bauer J, Van Gossum A, Klek S, et al. Diagnostic  
377 criteria for malnutrition - An ESPEN Consensus Statement. *Clin Nutr.* 2015;34(3):335-40.
- 378 6. Lönnroth K, Jaramillo E, Williams BG, Dye C, Raviglione M. Drivers of tuberculosis  
379 epidemics: The role of risk factors and social determinants. *Social Science & Medicine.*  
380 2009;68(12):2240-6.
- 381 7. Lonroth K, Williams BG, Cegielski P, Dye C. A consistent log-linear relationship  
382 between tuberculosis incidence and body mass index. *Int J Epidemiol.* 2010;39(1):149-55.
- 383 8. Lin HH, Wu CY, Wang CH, Fu H, Lönnroth K, Chang YC, et al. Association of Obesity,  
384 Diabetes, and Risk of Tuberculosis: Two Population-Based Cohorts. *Clin Infect Dis.*  
385 2018;66(5):699-705.
- 386 9. Leung CC, Lam TH, Chan WM, Yew WW, Ho KS, Leung G, et al. Lower Risk of  
387 Tuberculosis in Obesity. *Arch Intern Med.* 2007;167(12):1297-304.
- 388 10. Cegielski JP, Arab L, Cornoni-Huntley J. Nutritional risk factors for tuberculosis among  
389 adults in the United States, 1971-1992. *Am J Epidemiol.* 2012;176(5):409-22.
- 390 11. Porta M, editor. *A dictionary of epidemiology.* sixth ed: Oxford University Press; 2014.



- 391 12. Lönnroth K, Castro KG, Chakaya JM, Chauhan LS, Floyd K, Glaziou P, et al. Tuberculosis  
392 control and elimination 2010–50: cure, care, and social development. *Lancet*.  
393 2010;375:1814-29.
- 394 13. The state of food insecurity in the world Rome: Food and Agriculture Organization; 1999.
- 395 14. FAO, IFAD, UNICEF, WFP, WHO. The State of Food Security and Nutrition in the World  
396 2020. Transforming food systems for affordable healthy diets. Rome FAO; 2020.
- 397 15. Broca S, Stamoulis K. Micro- and Macroevidence on the Impact of Undernourishment. In:  
398 Taniguchi K, Wang X, editors. Nutrition intake and economic growth: studies on the cost  
399 of hunger. Rome: Food and Agriculture Organization of the United Nations; 2003. p. 126.
- 400 16. Physical status: The use and interpretation of anthropometry: report of a WHO expert  
401 committee. Geneva: World Health Organization,; 1995.
- 402 17. Shetty PS. Keynote Paper: Measures of nutritional status from anthropometric survey data.  
403 Measurement and assessment of food deprivation and under-nutrition In Proceedings of the  
404 International Scientific Symposium 2002; Rome: Italy Food and Agriculture Organization  
405 of the United Nations; 2002.
- 406 18. Lonroth K, Raviglione M. Global epidemiology of tuberculosis: prospects for control.  
407 *Semin Respir Crit Care Med*. 2008;29(5):481-91.
- 408 19. Oxlade O, Huang CC, Murray M. Estimating the Impact of Reducing Under-Nutrition on  
409 the Tuberculosis Epidemic in the Central Eastern States of India: A Dynamic Modeling  
410 Study. *PLoS One*. 2015;10(6):e0128187.
- 411 20. Paradkar M, Padmapriyadarsini C, Jain D, Shivakumar S, Thiruvengadam K, Gupte AN, et  
412 al. Tuberculosis preventive treatment should be considered for all household contacts of  
413 pulmonary tuberculosis patients in India. *PLoS One*. 2020;15(7):e0236743.

- 414 21. Global Health Observatory [Internet]. World Health Organization 2020 [cited 23rd January  
415 2021]. Available from: [https://www.who.int/data/gho/data/indicators/indicator-  
418 2021\]. Available from: https://www.who.int/data/gho/data/indicators/indicator-  
419 details/GHO/prevalence-of-underweight-among-adults-bmi-18-\(age-standardized-  
420 estimate\)](https://www.who.int/data/gho/data/indicators/indicator-<br/>416 details/GHO/prevalence-of-underweight-among-adults-bmi-18-(age-standardized-<br/>417 estimate)).
- 418 22. Levin ML. The occurrence of lung cancer in man. *Acta Unio Int Contra Cancrum*.  
419 1953;9(3):531-41.
- 420 23. Natarajan S, Lipsitz SR, Rimm E. A simple method of determining confidence intervals for  
421 population attributable risk from complex surveys. *Statistics in medicine*.  
422 2007;26(17):3229-39.
- 423 24. Dyer O. Covid-19: Hunger spreads and food prices soar amid pandemic, warns UN food  
424 agency. *BMJ*. 2021;373:n1643.
- 425 25. Hunger and food insecurity Rome Food and Agriculture Organization; 2021 [Available  
426 from: <http://www.fao.org/hunger/en/>].
- 427 26. Mansournia MA, Altman DG. Population attributable fraction. *BMJ*. 2018;360:k757.
- 428 27. Mishra S, Baral SD. Rethinking the population attributable fraction for infectious diseases.  
429 *The Lancet Infectious Diseases*. 2020;20(2):155-7.
- 430 28. Hanrahan CF, Golub JE, Mohapi L, Tshabangu N, Modisenyane T, Chaisson RE, et al.  
431 Body mass index and risk of tuberculosis and death. *AIDS*. 2010;24(10):1501-8.
- 432 29. Soh AZ, Chee CBE, Wang YT, Yuan JM, Koh WP. Diabetes and body mass index in  
433 relation to risk of active tuberculosis: a prospective population-based cohort. *The  
434 International Journal of Tuberculosis and Lung Disease*. 2019;23(12):1277-82.
- 435 30. International Institute for Population Sciences, ICF. National Family Health Survey  
436 (NFHS-4), 2015–16: India. IIPS Mumbai, India; 2017
